# Supplementary material
Source: PubMed Central journal article supplement (PMC4198421)
Supplement: NIHMS631423-supplement-01.pdf [file NIHMS631423-supplement-01.pdf]

**Supplementary Fig. 1:** Effect of silencing NRF-2 $\alpha$  and over-expressing NRF-2 $\alpha$  and  $\beta$  on GluA3 and GluA4 protein levels. (A-B) On western blot analysis, silencing of NRF-2 $\alpha$  with shRNA did not significantly change protein levels of GluA3 and GluA4 when compared to pBS/U6 empty vector controls.  $\beta$ -actin served as a loading control. N = 3 for each data point. (C-D) NRF-2 $\alpha$ / $\beta$  over-expression did not significantly change protein levels of GluA3 and GluA4 when compared to the pcDNA3.1 empty vector control.  $\beta$ -actin served as a loading control. N = 3 for each data point.
